# Supplementary material for: Inhibition of SMYD2 suppresses tumor progression by down-regulating microRNA-125b and attenuates multi-drug resistance in renal cell carcinoma
Source: PubMed Central journal article supplement (PMC6857066; doi:10.7150/thno.37628), 2019-10-22
Supplement: thnov09p8377s1.pdf [file thnov09p8377s1.pdf]

# **Inhibition of SMYD2 suppresses tumor progression by down-regulating microRNA-125b and attenuates multi-drug resistance in renal cell carcinoma**

Libin Yan<sup>1,2#</sup>, Beichen Ding<sup>1,3#</sup>, Haoran Liu<sup>1,2</sup>, Yangjun Zhang<sup>1,2</sup>, Jin Zeng<sup>1,2</sup>, Junhui Hu<sup>1,2</sup>, Weimin Yao<sup>1,2</sup>, Gan Yu<sup>1,2</sup>, Ruihua An<sup>3</sup>, Zhiqiang Chen<sup>1,2</sup>, Zhangqun Ye<sup>1,2</sup>, Jinchun Xing<sup>4</sup>, Kefeng Xiao<sup>5</sup>, Lily Wu<sup>6</sup>, Hua Xu<sup>1,2\*</sup>

1, Department of Urology, Tongji Hospital, Tongji Medical College, Huazhong University of Science and Technology, Wuhan, China;

2, Institute of Urology of Hubei Province, Wuhan, China

3, Department of Urinary Surgery, First Affiliated Hospital of Harbin Medical University, Harbin, Heilongjiang, China.

4, Department of Urology, The First Affiliated Hospital of Xiamen University, Xiamen, China.

5, Department of Urology, The People's Hospital of Shenzhen City, Shenzhen, China.

6, Department of Molecular and Medical Pharmacology, David Geffen School of Medicine, University of California at Los Angeles, Los Angeles, USA

#These authors have contributed equally to this work.

Figure S1

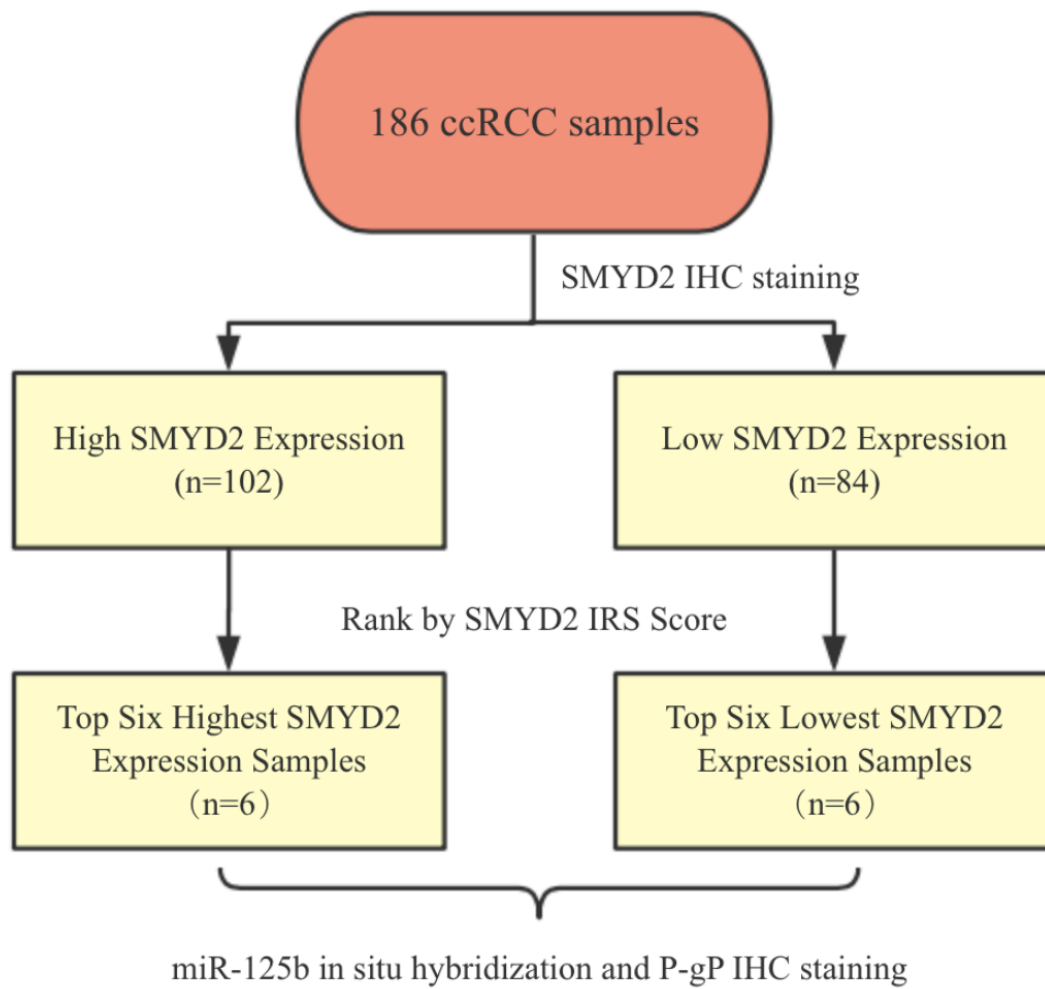

Figure S1 The flowchart was drawn to expound the criterion of sample selection for miR-125b in situ hybridization and P-gP IHC staining.

Figure S2

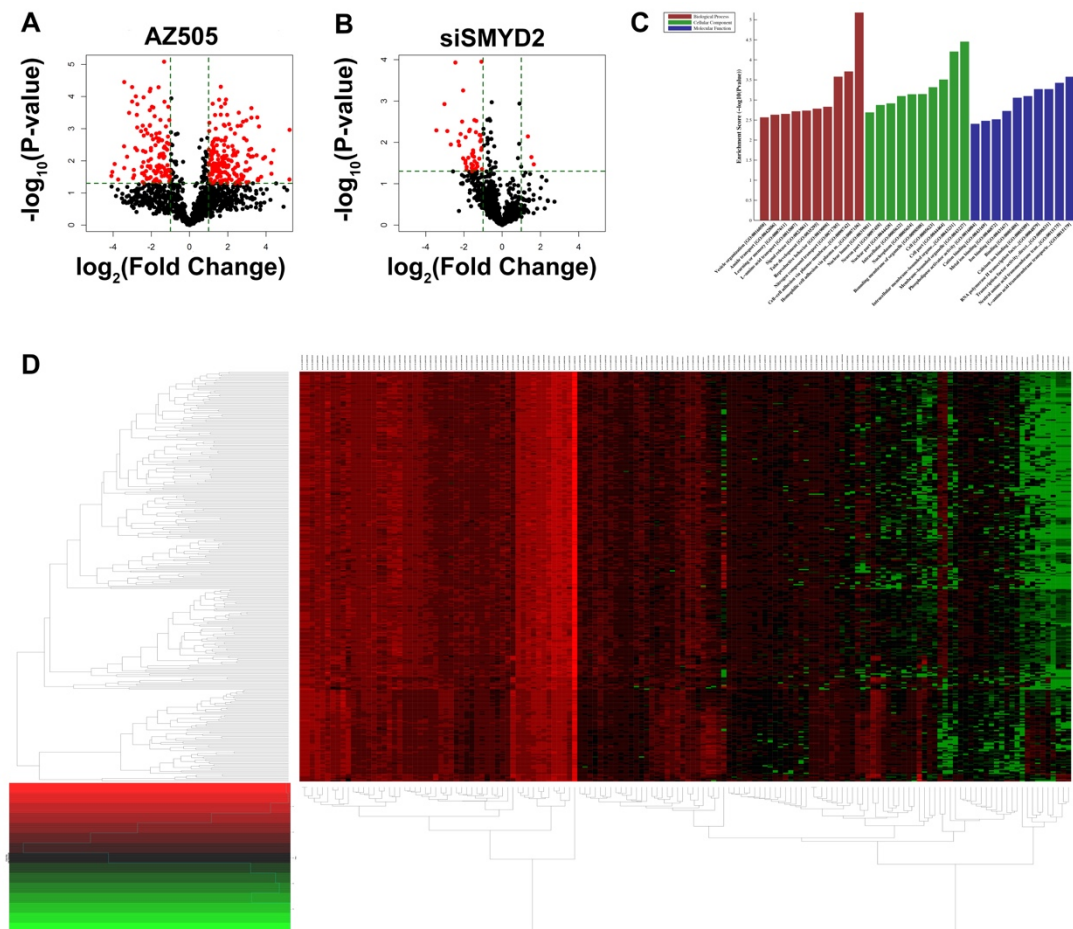

Figure S2. **Process of screening miRNAs.**

(A) and (B) Volcano map describes the differentially expressed miRNAs after AZ505 and siSMYD2 interference.

(C) Gene Ontology Enrichment analysis of target genes of the 6 selected miRNAs.

(D) Differentially expressed miRNAs in ccRCC from TCGA database.

$|\log_2(\text{Foldchange})| > 1$  and  $P < 0.05$ .

Figure S3

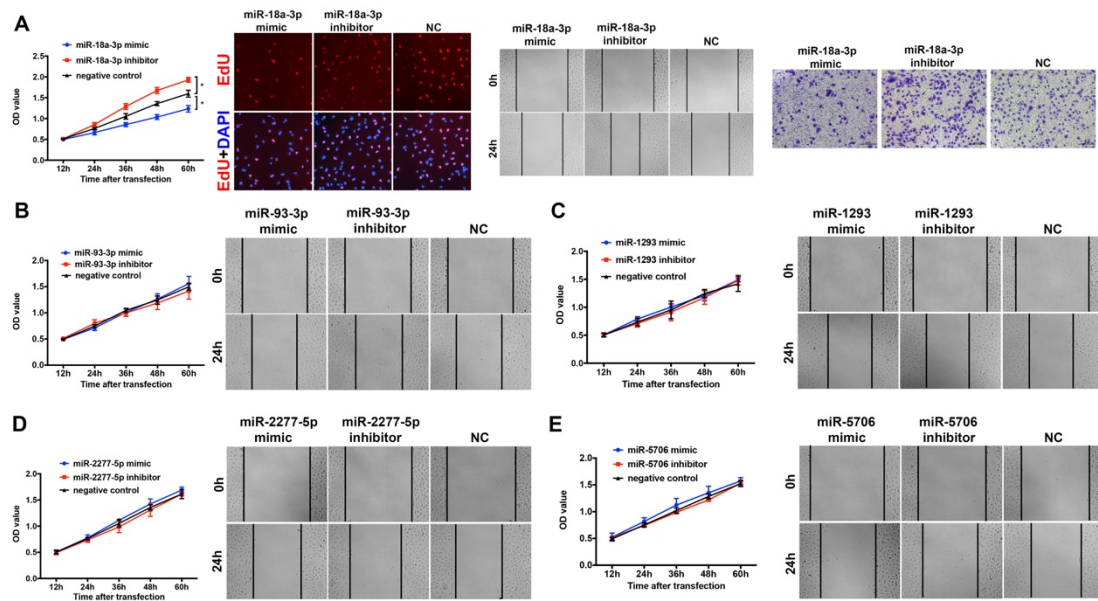

Figure S2. Verifying the effects of candidate miRNAs on RCC cells.

(A) miR-18a-3p inhibited the growth, invasion and migration of renal cancer cells.

(B),(C),(D) and (E) miR-93-3p, miR-1277-5p, miR-5706 and miR-1293 showed no obvious effect on cell proliferation and migration.

Table.S2 Sequences of siRNA and miRNA oligonucleotides

| Name                      | Sequence (5'-3')             |
|---------------------------|------------------------------|
| siSMYD2                   | Sense GAUUUGAUUCAGAGUGACA    |
|                           | Antisense UGUCACUCUGAAUCAAUC |
| hsa-miR-1293 mimic        | UGGGUGGUCUGGAGAUUUGUGC       |
| hsa-miR-1293 inhibitor    | GCACAAAUCUCCAGACCACCCA       |
| hsa-miR-2277-5p mimic     | AGCGCGGGCUGAGCGCUGCCAGUC     |
| hsa-miR-2277-5p inhibitor | GACUGGCAGCGCUCAGCCCGCGCU     |
| hsa-miR-5706 mimic        | UUCUGGAUAACAUGCUGAAGCU       |
| hsa-miR-5706 inhibitor    | AGCUUCAGCAUGUUAUCCAGAA       |
| hsa-miR-93-3p mimic       | ACUGCUGAGCUAGCACUUCCCG       |
| hsa-miR-93-3p inhibitor   | CGGGAAGUGCUAGCUCAGCAGU       |
| hsa-miR-18a-3p mimic      | ACUGCCCUAAGUGCUCUUCUGG       |
| hsa-miR-18a-3p inhibitor  | CCAGAAGGAGCACUUAGGGCAGU      |
| hsa-miR-125b mimic        | UCCCUGAGACCCUAACUUGUGA       |
| hsa-miR-125b inhibitor    | UCACAAGUUAGGGUCUCAGGGA       |

Table.S3 Associations between clinicopathological parameters and SMYD2 expression in ccRCC patients

|                            | n           | SMYD2 expression |      | P-value       |
|----------------------------|-------------|------------------|------|---------------|
|                            |             | Low              | High |               |
| Total                      | 186         | 84               | 102  |               |
| Age (year)                 |             |                  |      | 0.669         |
| 58 or younger              | 95(51.1%)   | 42               | 53   |               |
| Older than 58              | 91(48.9%)   | 42               | 49   |               |
| Gender                     |             |                  |      | 0.399         |
| Male                       | 149 (80.1%) | 70               | 79   |               |
| Female                     | 37 (19.9%)  | 14               | 23   |               |
| TNM stage                  |             |                  |      | <b>0.007</b>  |
| I-II                       | 86(46.2%)   | 48               | 38   |               |
| III-IV                     | 100(53.8%)  | 36               | 64   |               |
| Fuhrman grade              |             |                  |      | 0.840         |
| G1-2                       | 107 (57.5%) | 49               | 58   |               |
| G3-4                       | 79 (42.5%)  | 35               | 44   |               |
| Metastasis at<br>Diagnosis |             |                  |      | <b>0.009*</b> |
| No                         | 178(95.7%)  | 84               | 94   |               |
| Yes                        | 8(4.3%)     | 0                | 8    |               |
| Operation                  |             |                  |      | 0.759         |
| Radical                    | 148 (79.5%) | 66               | 82   |               |
| Partial                    | 38 (20.5%)  | 18               | 20   |               |
| Status of patients         |             |                  |      | <b>0.002</b>  |
| Alive                      | 144(77.4%)  | 74               | 70   |               |
| Disease related-death      | 42(22.6%)   | 10               | 32   |               |
| Recurrence                 |             |                  |      | <b>0.032</b>  |
| No evidence                | 122(65.6%)  | 62               | 60   |               |

---

|     |           |    |    |
|-----|-----------|----|----|
| Yes | 64(34.4%) | 22 | 42 |
|-----|-----------|----|----|

---

TNM, tumor node metastasis; Radical, radical nephrectomy; Partial, partial nephrectomy

P-values are from chi-square or Fisher's exact test and were statistically significant at

P<0.05, statistically significant values are in bold; \* Fisher's exact test

Table.S5 The effects of 6 candidate miRNAs on RCC cells.

| miRNA       | MTS assay | Edu assay | Wound healing assay | Transwell Invasion |
|-------------|-----------|-----------|---------------------|--------------------|
| miR-125b    | No effect | No effect | +                   | +                  |
| miR-18a-3p  | -         | -         | -                   | -                  |
| miR-93a-3p  | No effect | /         | No effect           | /                  |
| miR-1293    | No effect | /         | No effect           | /                  |
| miR-2277-5p | No effect | /         | No effect           | /                  |
| miR-5706    | No effect | /         | No effect           | /                  |

+, tumor promoting; -, tumor suppressing; /, no data.
